# Supplementary material for: Multifunctional MXene/PAA organohydrogel as a flexible strain sensor for wearable human–machine interaction
Source: Royal Society of Chemistry journal article supplement (doi:10.1039/d3lp00052d), 2023-01-01
Supplement: d3lp00052d1.pdf [file d3lp00052d1.pdf]

## Supporting Information

### **Multifunctional MXene/PAA Organohydrogel as Flexible Strain Sensor for Wearable Human-Machine Interaction**

Ning Ding<sup>a</sup>, Yan Bai<sup>a</sup>, Yuhui Feng<sup>a</sup>, Xiang Zou<sup>a</sup>, Yuzhe Chen<sup>a</sup>, Shuaihang Bi<sup>a</sup>, Shujuan Liu<sup>a</sup>, Weiwei Zhao<sup>a,\*</sup>, and Qiang Zhao<sup>a,b,\*</sup>

<sup>a</sup>. State Key Laboratory of Organic Electronics and Information Displays & Jiangsu Key Laboratory for Biosensors, Institute of Advanced Materials (IAM), Nanjing University of Posts & Telecommunications, 9 Wenyuan Road, Nanjing 210023, China.

<sup>b</sup>. College of Electronic and Optical Engineering & College of Flexible Electronics (Future Technology), Nanjing University of Posts & Telecommunications, 9 Wenyuan, Nanjing 210023, China.

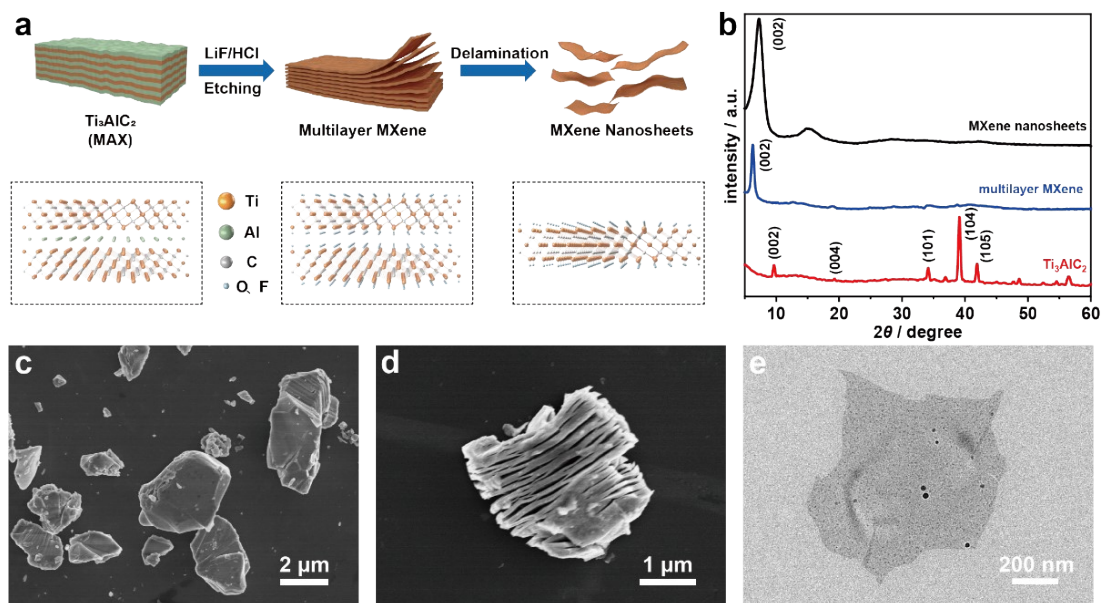

**Fig. S1** a) Schematic illustration of etching MAX and stripping multilayer MXene. b) XRD patterns of  $Ti_3AlC_2$ , accordion-like multilayer MXene and MXene nanosheets. SEM images of  $Ti_3AlC_2$  bulks c) and multilayer MXene d). e) TEM image of MXene nanosheets.

Compared to  $Ti_3AlC_2$  bulks, the peak intensity of multilayer MXene at  $39^\circ$  shows a significant decrease, suggesting the successful removal of the majority of Al layers through etching. Furthermore, the shift in the (002) peak towards a smaller angle indicates an expansion in interlayer spacing. Notably, the peak of MXene nanosheets at  $39^\circ$  completely disappears, confirming the successful removal of partially etched  $Ti_3AlC_2$  bulks after ultrasonic peeling and centrifugal collection. Consequently, a pure solution of MXene nanosheets is obtained (Fig. S1b).

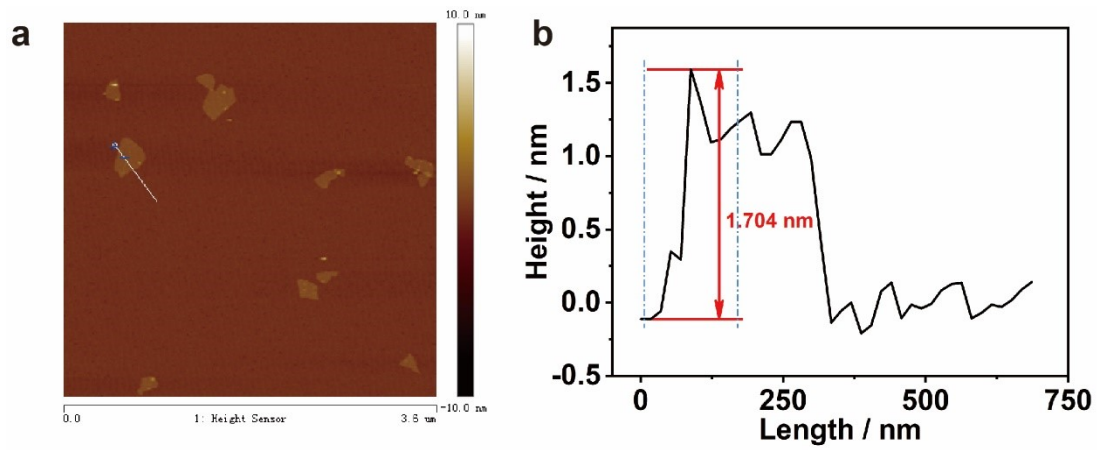

**Fig. S2** AFM image a) and the corresponding thickness analysis b) of MXene nanosheets.

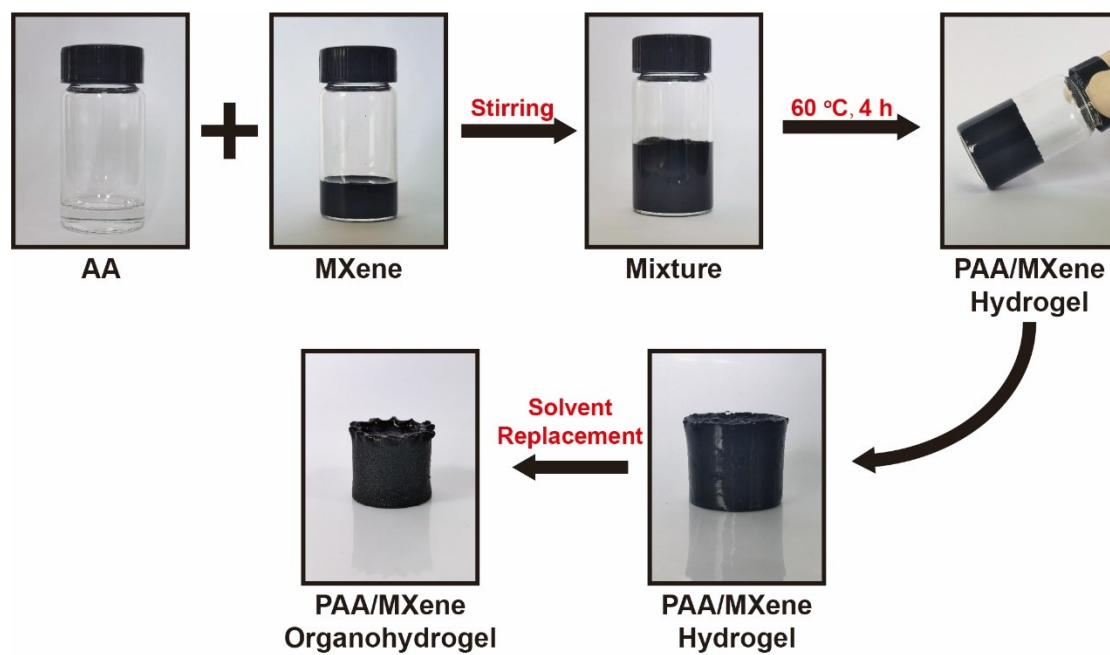

**Fig. S3** Photographs of preparation process of MXene/PAA organohydrogel.

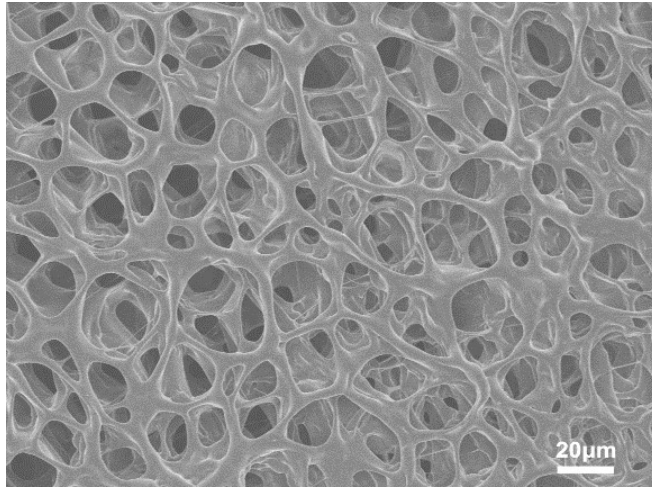

**Fig. S4** SEM image of MXene/PAA hydrogel.

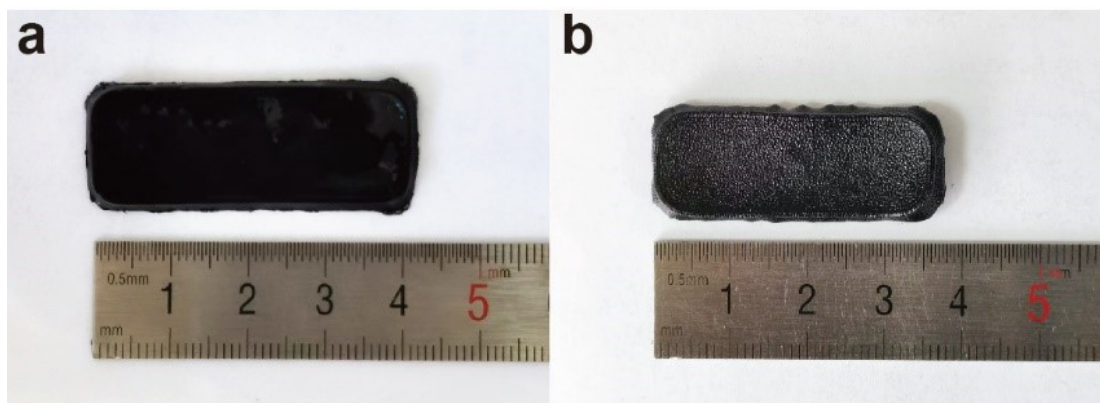

**Fig. S5** Photographs of MXene/PAA hydrogel a) before and b) after solvent replacement.

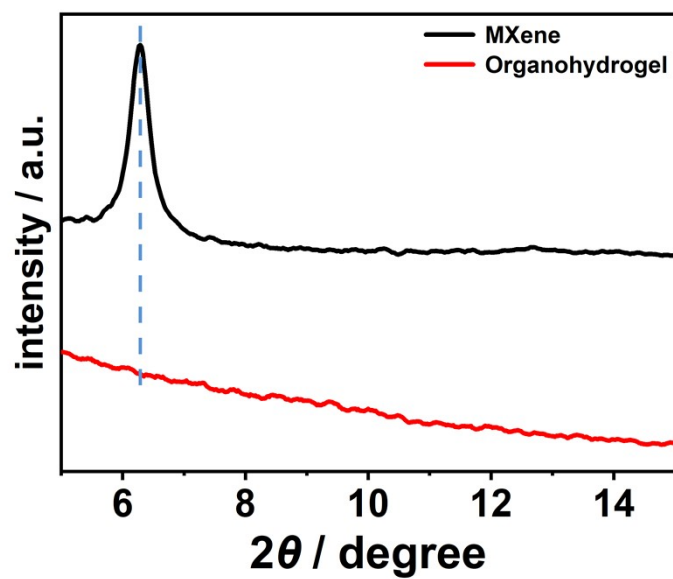

**Fig. S6** XRD patterns of MXene nanosheets and MXene/PAA organohydrogel.

Compared with MXene nanosheets, XRD pattern of organohydrogel lacks obvious features or sharp diffraction peaks, indicating a lack of long-range order. This can be attributed to the complete encapsulation of MXene nanosheets during AA polymerization, resulting in their high dispersion in the organic hydrogel system.

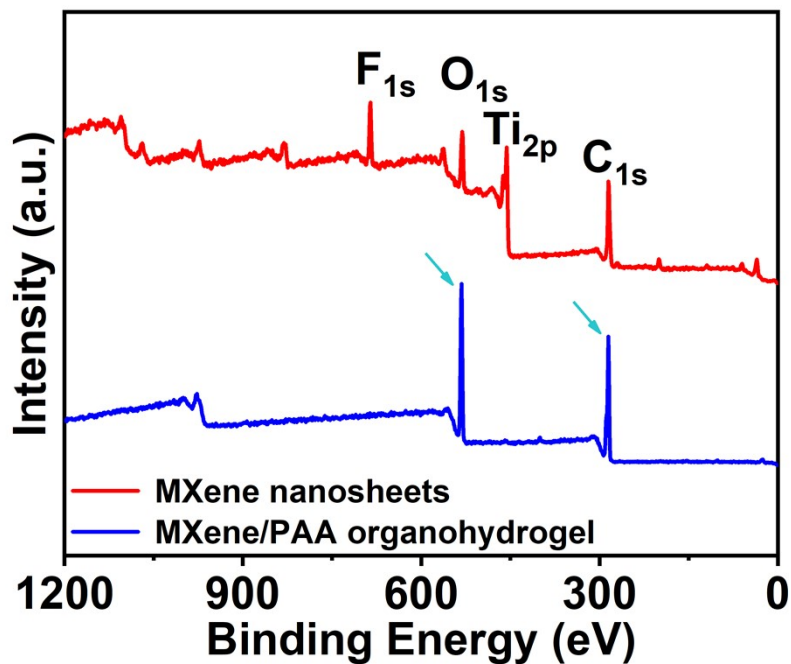

**Fig. S7** XPS patterns of MXene nanosheets and MXene/PAA organohydrogel.

In comparison with pure MXene nanosheets, the peak intensity of MXene-specific elements (e.g., Ti and F) in MXene/PAA organohydrogel shows a noticeable reduction, suggesting a complete coverage and encapsulation of the MXene nanosheets by the organic polymer. The polymer molecules form a dense and continuous coating around the nanosheets, creating a physical barrier that inhibits the photoelectron escape process and attenuates the signal during XPS analysis.<sup>1</sup>



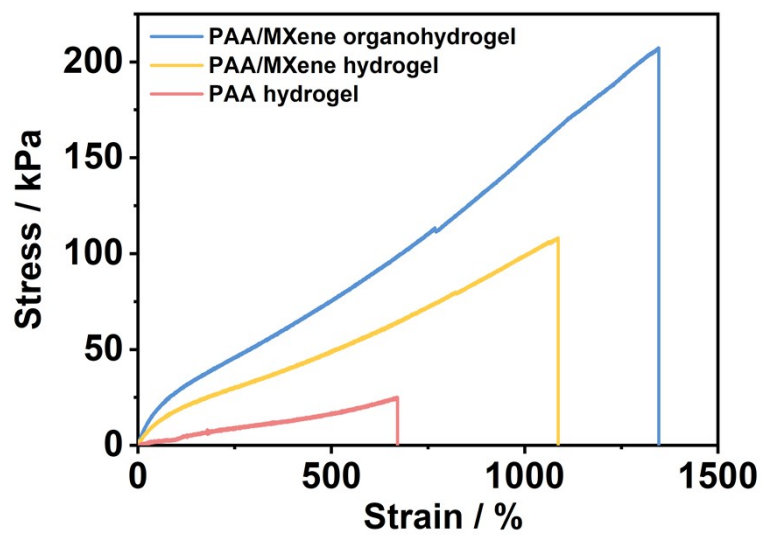

**Fig. S8** Stress-strain curves of MXene/PAA organohydrogel, MXene/PAA hydrogel and PAA hydrogel.

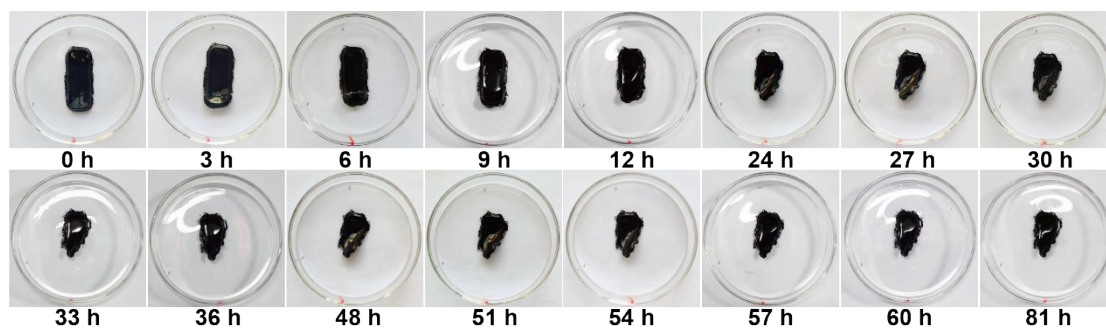

**Fig. S9** Photographs of MXene/PAA hydrogel after placing for different times at 20 °C and 45% humidity.

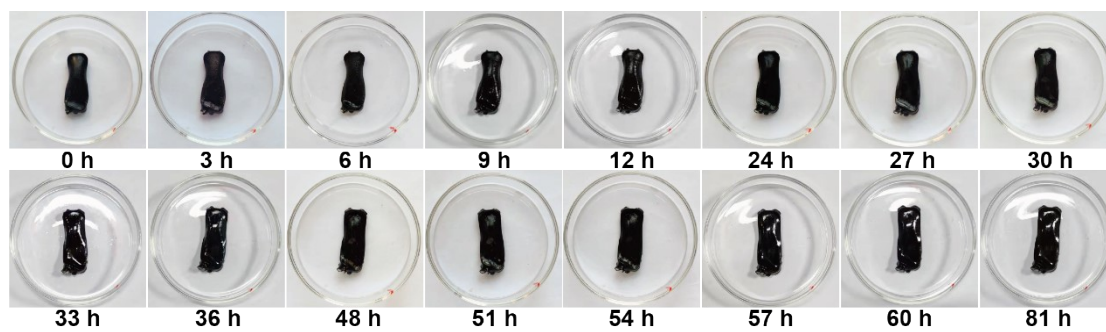

**Fig. S10** Photographs of MXene/PAA organohydrogel after placing for different times at 20 °C and 45% humidity.

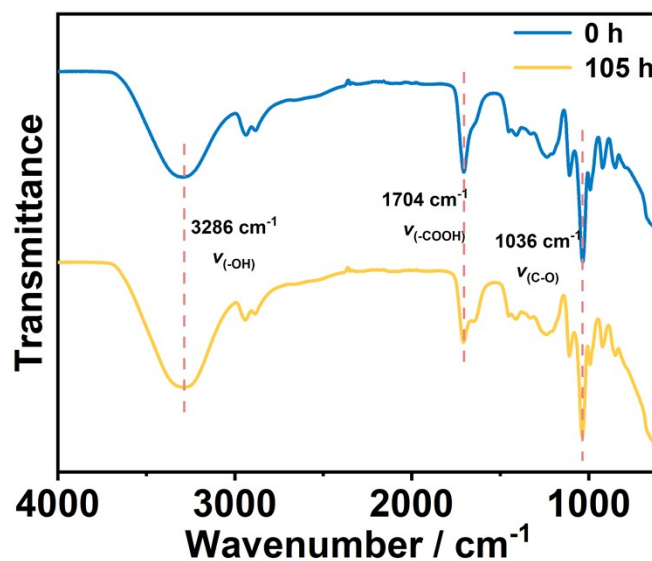

**Fig. S11** ATR-FTIR spectra of MXene/PAA organohydrogel before and after placing for 105 h at 20 °C and 45% humidity.

ATR-FTIR spectra were analyzed to obtain a comprehensive understanding of the water retention capacity of MXene/PAA organohydrogel. The position of the characteristic peaks remains consistent without any noticeable shifts, indicating that the organohydrogel effectively maintains its water content for a duration of 105 hours.

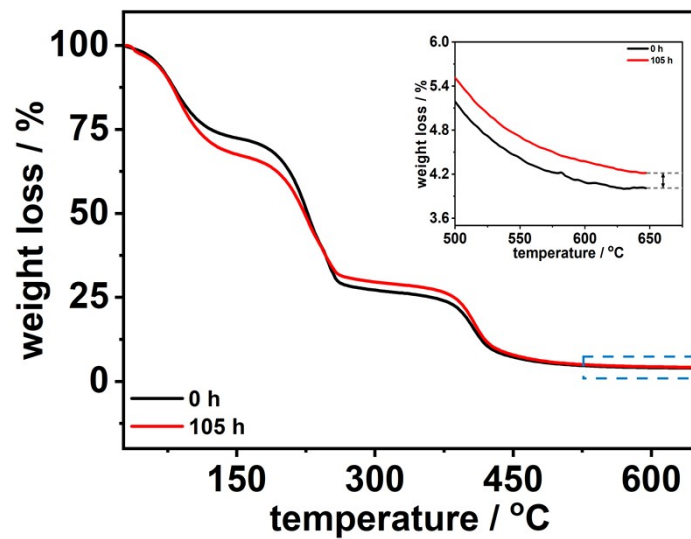

**Fig. S12** TGA spectra of MXene/PAA organohydrogel before and after placing for 105 h at 20 °C and 45% humidity.

**Table S1.** Comparisons of the conductivity of pristine MXene, MXene/PAA hydrogel and MXene/PAA organohydrogel.

| Samples                  | Conductivity            |
|--------------------------|-------------------------|
| MXene                    | 7241 S·cm <sup>-1</sup> |
| MXene/PAA hydrogel       | 31 mS·m <sup>-1</sup>   |
| MXene/PAA organohydrogel | 6.3 μS·m <sup>-1</sup>  |

**Table S2.** Comparison of comprehensive performance of different MXene-based hydrogels or organohydrogels.

| gels                       | $\epsilon_{max}$<br>(%) | Fracture        |              |              |               |              | GF           | Ref.             |
|----------------------------|-------------------------|-----------------|--------------|--------------|---------------|--------------|--------------|------------------|
|                            |                         | stress<br>(MPa) | Self-healing | Adhesiveness | Anti-freezing | Moisturizing |              |                  |
| <b>MXene/PAA/Gly</b>       | <b>1346</b>             | <b>0.207</b>    | Yes          | Yes          | Yes           | Yes          | <b>10.96</b> | <b>This work</b> |
| MXene/PAA                  | 1081                    | 0.101           | Yes          | Yes          | N/A           | N/A          | 4.94         | 2                |
| MXene/PVA/Borate           | 1200                    | 0.0054          | Yes          | N/A          | N/A           | N/A          | 0.4          | 3                |
| MXene/PVA-CA               | 1100                    | 0.0097          | Yes          | Yes          | N/A           | N/A          | 2.3          | 4                |
| MXene/PAA/PAM/TA           | 560.82                  | 0.251           | Yes          | N/A          | N/A           | N/A          | 10.536       | 5                |
| MXene/PAM/SA               | 2000                    | 0.061           | N/A          | N/A          | N/A           | N/A          | 1.4          | 6                |
| MXene/Gluten/EG            | 600                     | 0.092           | Yes          | Yes          | Yes           | Yes          | 6.1          | 7                |
| MXene/PAM/<br>PEDOT:PSS/EG | 897                     | 0.0293          | N/A          | Yes          | Yes           | Yes          | 10.69        | 8                |

Note: 'N/A' indicates 'not available' in the references.

**Table S3.** Comparison of comprehensive performance of different organohydrogels.

| Organohydrogels                      | $\epsilon_{\max}$<br>(%) | Fracture stress<br>(MPa) | GF           | Ref.             |
|--------------------------------------|--------------------------|--------------------------|--------------|------------------|
| <b>MXene/PAA/Gly</b>                 | <b>1346</b>              | <b>0.207</b>             | <b>10.96</b> | <b>This work</b> |
| PG-Borate/PAM/PPy/Gly                | 500                      | 0.051                    | 4.8          | 9                |
| PVA/CNT-OH/EG                        | 408                      | 0.206                    | 1.52         | 10               |
| PAMPs-co-PAAM/PVA/EG                 | 648                      | 0.075                    | 1.77         | 11               |
| ANF/PVA/KCl/DMSO                     | 450                      | 2.3                      | 1.99         | 12               |
| PAM/SA/TOCNs/CaCl <sub>2</sub> /DMSO | 681                      | 1.04                     | 2.1          | 13               |
| PAA/PCA/Zn <sup>2+</sup> /BDO        | 650                      | 0.25                     | 1.486        | 14               |



## Notes and references

- 1 Q. Wang, X. Pan, C. Lin, H. Gao, S. Cao, Y. Ni and X. Ma, Chem. Eng. J., 2020, **401**, 126129.
- 2 Y. Bai, Y. Lu, S. Bi, W. Wang, F. Lin, F. Zhu, P. Yang, N. Ding, S. Liu, W. Zhao, N. Liu and Q. Zhao, Adv. Mater. Technol., 2023, **8**, 2201767.
- 3 J. Zhang, L. Wan, Y. Gao, X. Fang, T. Lu, L. Pan and F. Xuan, Adv. Electron., Mater. 2019, **5**, 1900285.
- 4 A. Chae, G. Murali, S. Y. Lee, J. Gwak, S. J. Kim, Y. J. Jeong, H. Kang, S. Park, A. S. Lee, D. Y. Koh, I. In and S. J. Park, Adv. Funct. Mater., 2023, **33**, 2213382.
- 5 M. Qin, W. Yuan, X. Zhang, Y. Cheng, M. Xu, Y. Wei, W. Chen and D. Huang, Colloids Surf. B, 2022, **214**, 112482.
- 6 H. Luan, D. Zhang, Z. Xu, W. Zhao, C. Yang and X. Chen, J. Mater. Chem. C, 2022, **10**, 7604-7613.
- 7 H. Xu, X. Jiang, K. Yang, J. Ren, Y. Zhai, X. Han, H. Cai and F. Gao, Colloids Surf. A Physicochem. Eng. Asp. 2022, **636**, 128182.
- 8 S. J. Wang, Z. Chen, X. Hu, J. Zou, Z. Xie, H. Y. Mi, Z. H. Liu, Z. Zhang, Y. Shang and X. Jing, J. Mater. Chem. C, 2022, **10**, 11914-11923.
- 9 Z. Bei, Y. Chen, S. Li, Z. Zhu, J. Xiong, R. He, C. Zhu, Y. Cao and Z. Qian, Chem. Eng. J., 2023, **451**, 138675.
- 10 W. Feng, Y. Chen, Y. Jiang, A. Hu, W. Wang and D. Yu, Polymer 2022, **262**.
- 11 G. Jung, H. Lee, H. Park, J. Kim, J. Wook Kim, D. Sik Kim, K. Keum, Y. Hui Lee and J. Sook Ha, Chem. Eng. J., 2022, **450**, 138379.

- 12 J. Lyu, Q. Zhou, H. Wang, Q. Xiao, Z. Qiang, X. Li, J. Wen, C. Ye and M. Zhu, *Adv. Sci.*, 2023, **10**, e2206591.
- 13 Y. Cheng, J. Zang, X. Zhao, H. Wang and Y. Hu, *Carbohydr. Polym.*, 2022, **277**, 118872.
- 14 Q. Li, J. Chen, Y. Zhang, C. Chi, G. Dong, J. Lin and Q. Chen, *ACS Appl. Mater. Interfaces*, 2021, **13**, 51546-51555.
